# Supplementary material for: Developmental Exposure to Kynurenine Affects Zebrafish and Rat Behavior
Source: MDPI journal article supplement (doi:10.3390/cells12182224), 2023-09-06
Supplement: s1 [file s1]

## Supplementary materials

**Fig. S1.** Locomotor activity under the light-dark transition assay of 5-day-old larval zebrafish exposed to KYN from 1 to 72 (A–D), and from 49 to 72 (E–H) hpf. Distance traveled for 10 min by each larva during the light phase (A, E) and the dark phase (C, G); mean  $\pm$  SD plotted in black, the median value displayed as a horizontal bar in blue. Median distance traveled for 10 min, calculated for each group during the light phase (B, F) and the dark phase (D, H). Number of subjects = 31–32 per group; \* $p < 0.05$  vs. controls, non-parametric ANOVA. KYN – kynurenine. Note that the vertical axis is different on the left and right panels.

**Fig. S2.** Evidence for the formation of KYN metabolites by zebrafish larvae. Upper panel – the chromatogram shows the authentic KYN (standard), no significant chromatographic signal present; middle panel – the representative chromatogram shows recording obtained from medium + KYN 100  $\mu$ M, incubation time 24 h; lower panel - the representative chromatogram shows recording obtained from medium + KYN 100  $\mu$ M inhabited with zebrafish larvae (N= 20, 96-119 dpf), incubation time 24 h. Note that the detection conditions were optimally set for KYNA detection. All analyses were performed under identical chromatographic conditions. Green arrows indicate at least 3 peaks, representing 3 unidentified substances that were formed in the presence of KYN in the medium due to zebrafish larvae. Blue arrows indicate substances that have formed in the KYN medium without the presence of larvae. It is worth noting that there are 3 other peaks in the two lower panels, which represent spontaneously formed KYN derivatives. KYN-kynurenine.

**Fig. S3.** Identification of KYNA-like substance in zebrafish incubation medium by comparison of retention time of peaks in samples with authentic KYNA. Upper panel - the chromatogram shows the authentic KYNA (Sigma-Aldrich; standard), retention time 13.37 min; middle panel – the representative chromatogram shows recording obtained from medium + KYN 100  $\mu$ M, incubation time 24 h; lower panel - the representative chromatogram shows recording obtained from medium + KYN 100  $\mu$ M inhabited with zebrafish larvae (N=20, 96-119 dpf), incubation time 24 h. The vertical dashed line shows the retention time for the KYNA standard. No peak was found in the medium without KYN - data not shown. All analyses were performed under identical chromatographic conditions. KYN-kynurenine, KYNA-kynurenic acid.

**Fig. S4.** Identification of KYNA-like substance in zebrafish incubation medium by addition of an internal standard to the original sample. Upper panel - the chromatogram shows the authentic KYNA (Sigma-Aldrich; standard); middle panel – the representative chromatogram shows recording obtained from medium + KYN 100  $\mu$ M inhabited with zebrafish larvae (N=20, 96-119 dpf), incubation time 24 h; lower panel - the chromatogram shows recording obtained from medium + KYN 100  $\mu$ M inhabited with zebrafish larvae (N=20, 96-119 dpf), incubation time 24 h; after incubation samples were added with authentic KYNA (standard). Both lower panels show records derived from the same colony of larvae, yet the vertical scale is different on the two panels. The vertical dashed line shows the retention time for the KYNA standard. KYN-kynurenine, KYNA-kynurenic acid.

**Fig. S5.** Effect of KYN administration during ED 1–7 on the body mass gain of male (A) and female (B) rats. Data are presented as a mean  $\pm$  standard error of the mean (SEM), number of subjects = 30–

40 per group, circles – controls, squares – KYN-treated rats. \* $p < 0.05$  vs. respective controls. ED – embryonic day, PND – postnatal day.

**Fig. S6.** Effect of KYN administration during ED 1–7 on the spontaneous and stimulated locomotor activity of adult male rats. Data are presented as a mean  $\pm$  SEM, number of subjects = 9 per group, circles – controls, squares – KYN-treated rats. \* $p < 0.05$  vs. respective controls. ED – embryonic day.

**Fig. S7.** Effect of KYN administration during ED 1–7 on the spontaneous and stimulated locomotor activity of adult female rats. Data are presented as a mean  $\pm$  SEM, number of subjects = 9 per group, circles – controls, squares – KYN-treated rats. \* $p < 0.05$  vs. respective controls. ED – embryonic day.

**Fig. S8.** Effect of KYN administration during ED 1–7 on the anxiety-like behavior of adult rats, estimated in the elevated plus-maze test. Number of entries into the open arms (A, B), time spent by rats in the open arms (C, D), number of total entries into the both open and closed arms, as a read out of locomotor activity (E, F). Data are presented as a mean  $\pm$  SEM, number of subjects = 10 per group, \* $p < 0.05$  vs. respective controls. ED – embryonic day, KYN – kynurenine.

**Fig. S9.** Effect of KYN administration during ED 1–7 on the reversal learning of adult rats. Escape latency (A, B), errors committed (C, D), entries into the previous escape location (E, F). Data are presented as a mean  $\pm$  SEM, number of subjects = 10 per group, \* $p < 0.05$  vs. respective controls. ED – embryonic day, KYN – kynurenine.

**Fig. S10.** Effect of KYN administration during ED 1–7 on the associative learning of adult rats. Training of the fear conditioning test (A, B), contextual fear conditioning test (C, D), cue fear conditioning test (E, F). Data are presented as a mean  $\pm$  SEM, number of subjects = 10 per group, \* $p < 0.05$  vs. respective controls. ED – embryonic day, KYN – kynurenine.

**Table S1.** Effect of KYN administration during ED 1–7 on the level of tryptophan, KYN and KYNA in mother's plasma

**Table S2.** Effect of KYN administration during ED 1–7 on the level of tryptophan, KYN and KYNA in male offspring's plasma

**Table S3.** Effect of KYN administration during ED 1–7 on the level of tryptophan, KYN and KYNA in female offspring's plasma

**Table S4.** Effect of KYN administration during ED 1–7 on anxiety-like behavior and memory processes of adult male rats

**Table S5.** Effect of KYN administration during ED 1–7 on anxiety-like behavior and memory processes of adult female rats

Fig. S1.

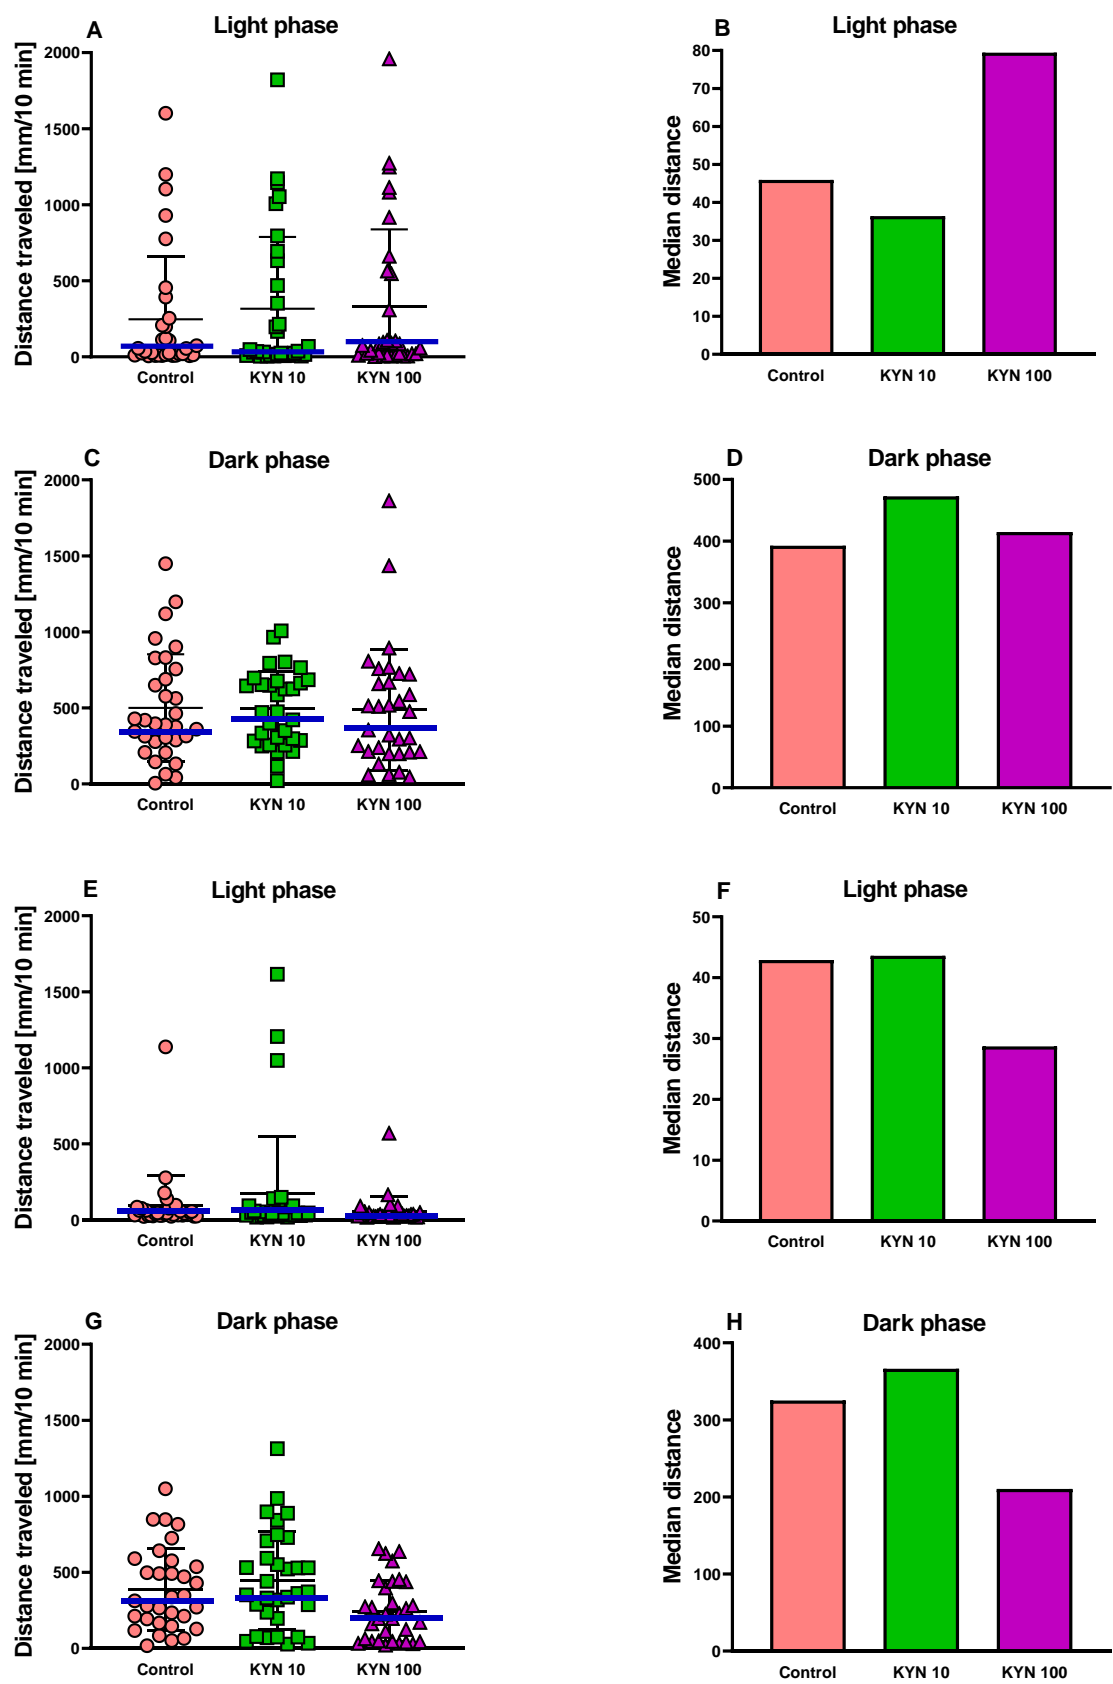

**Fig. S2.**

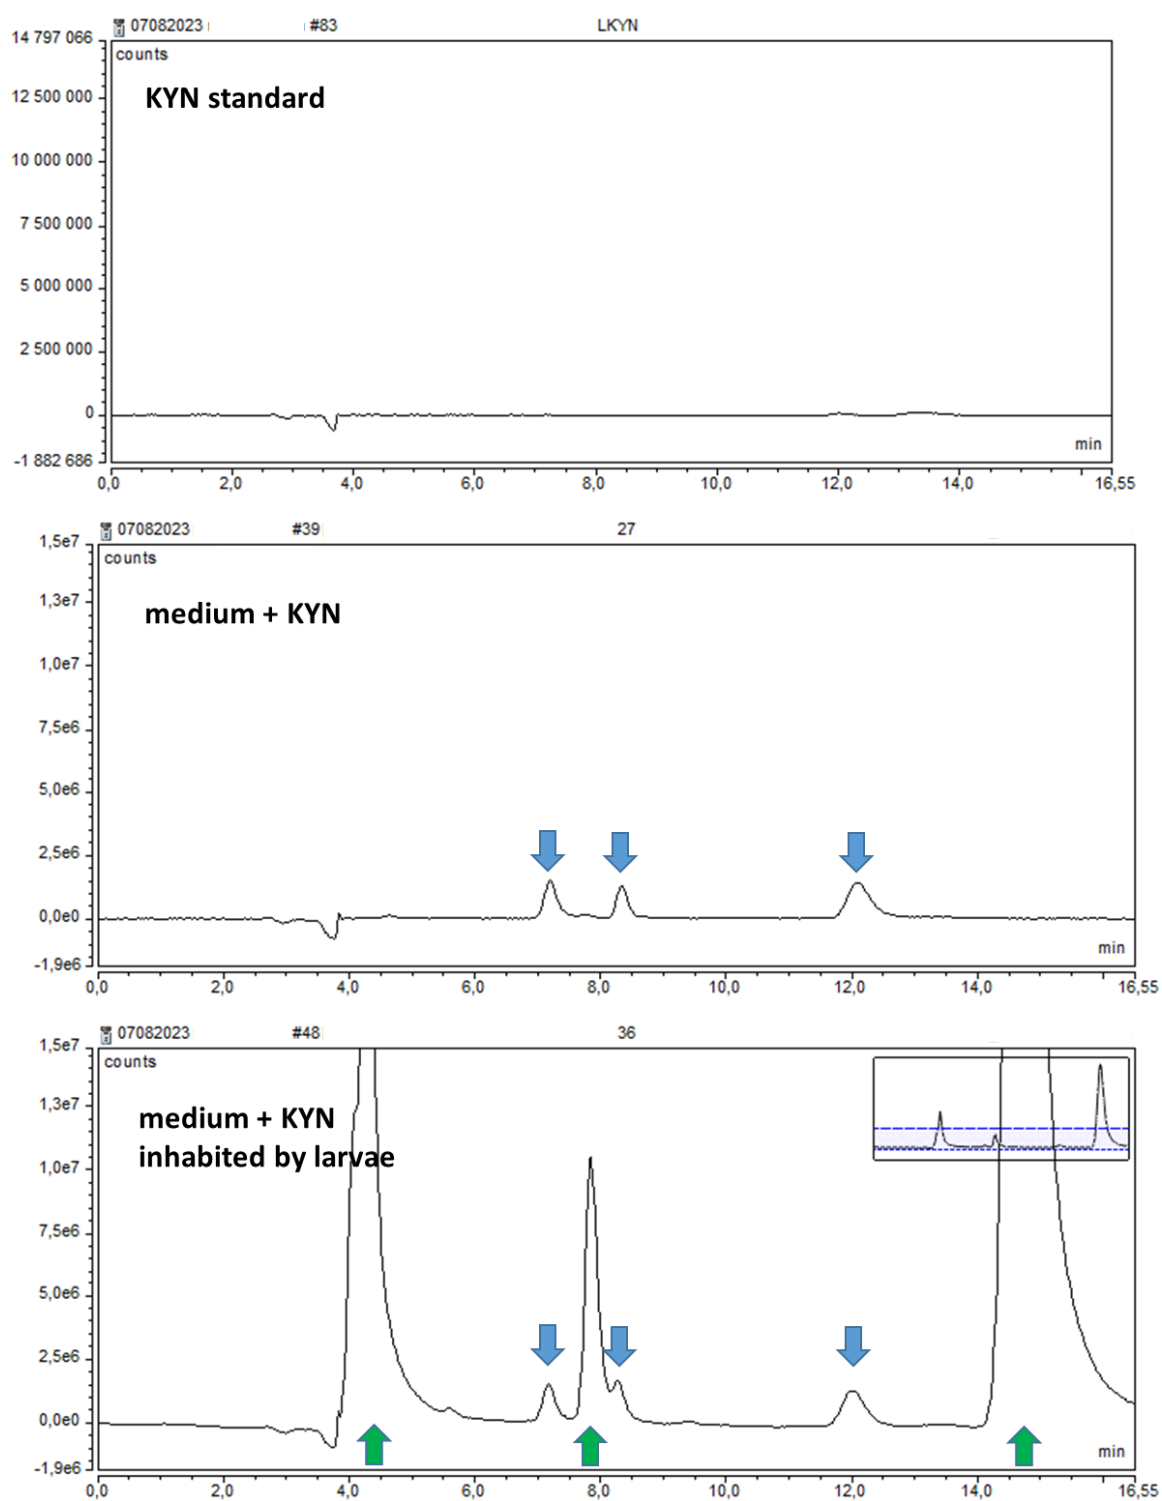

**Fig. S3.**

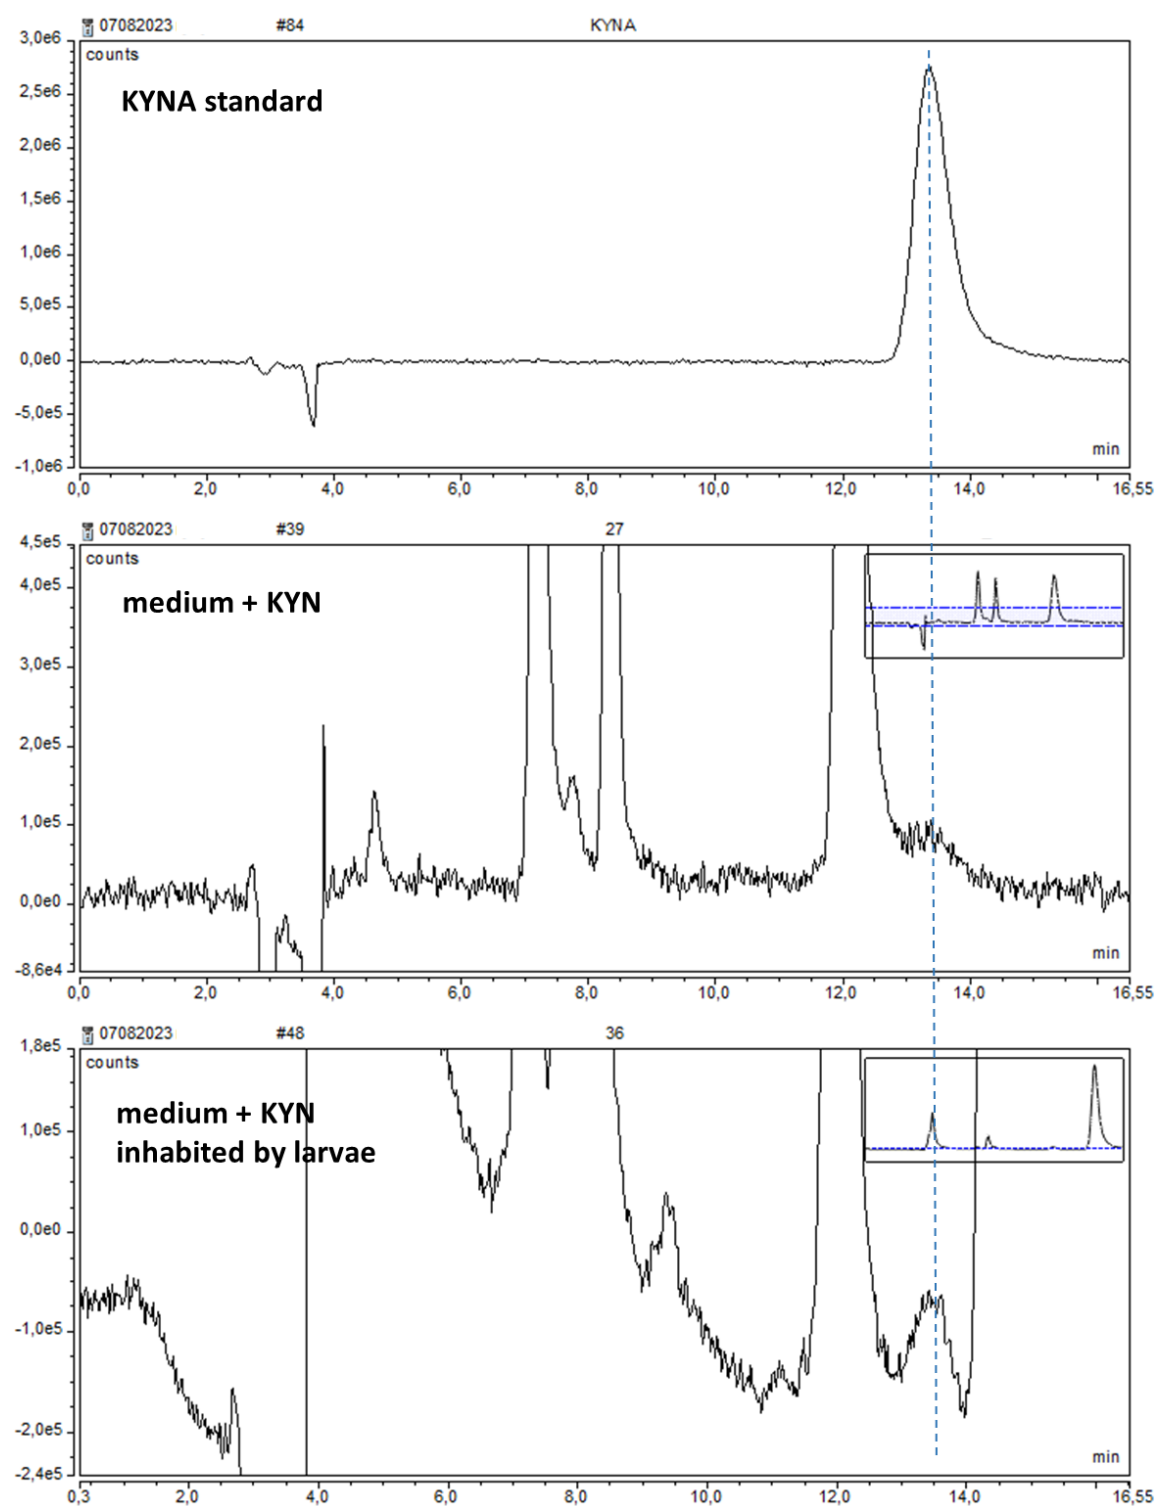

Fig. S4.

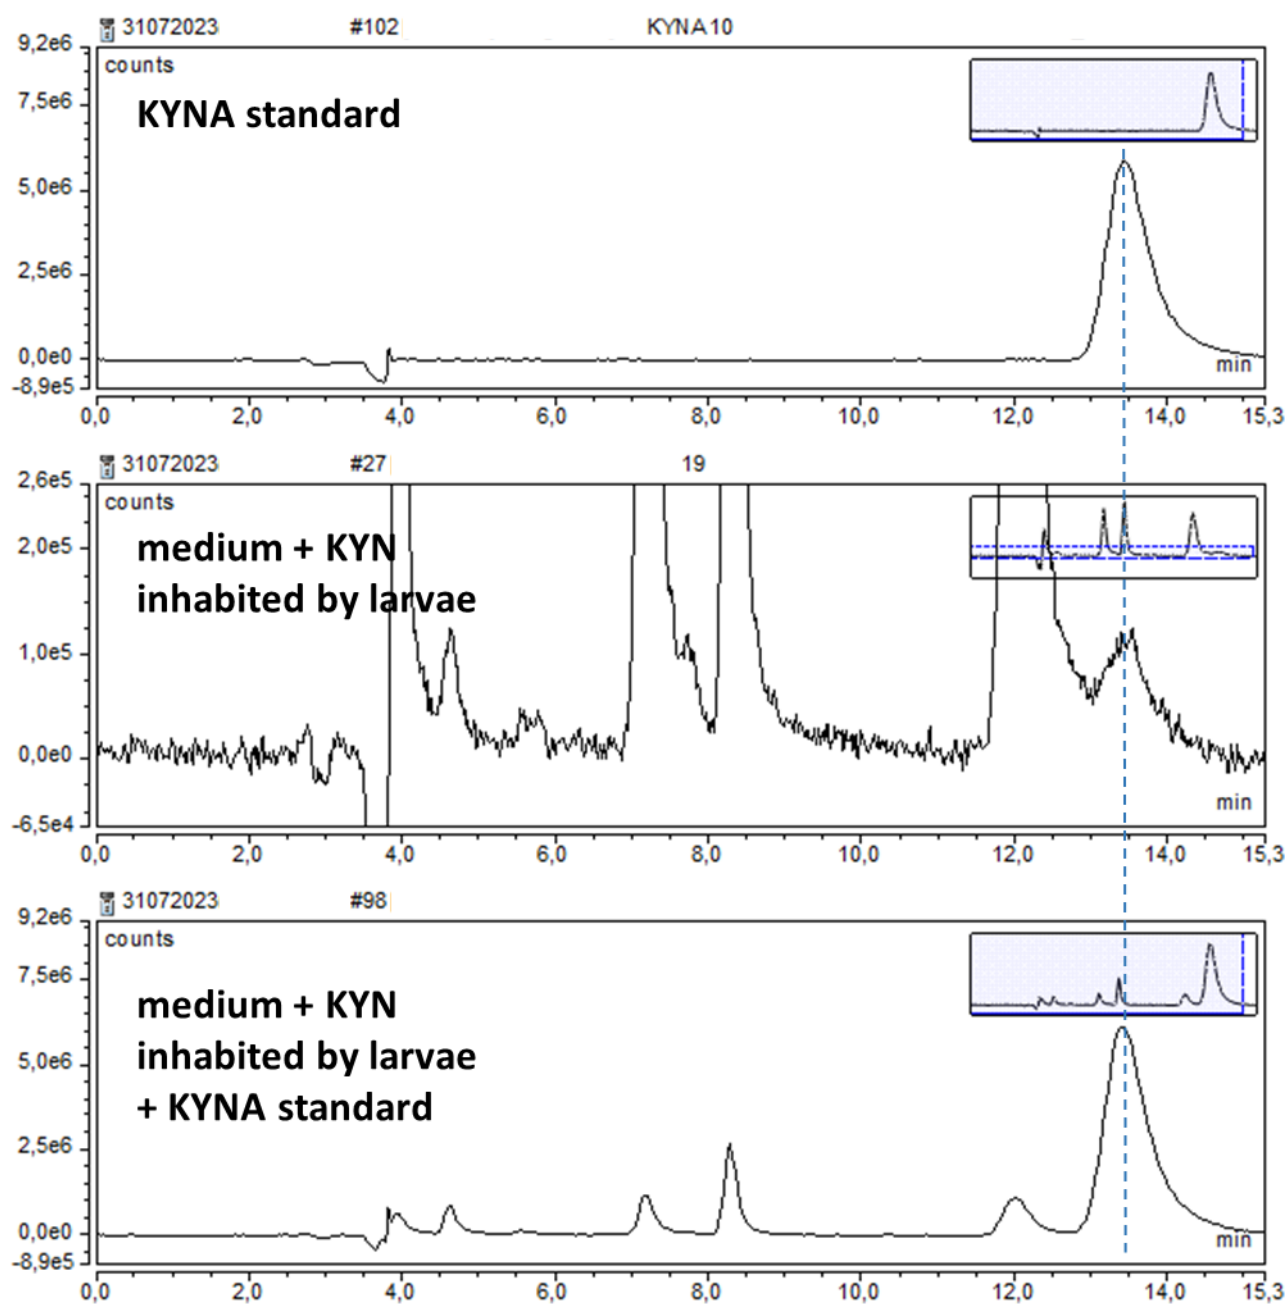

Fig. S5.

A

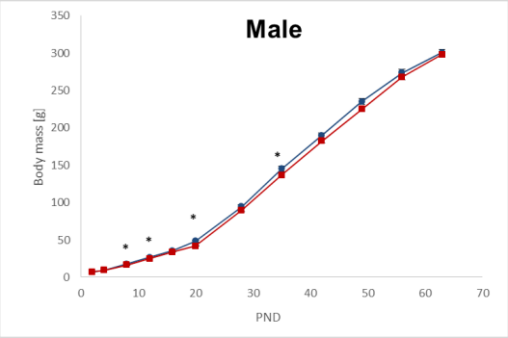

B

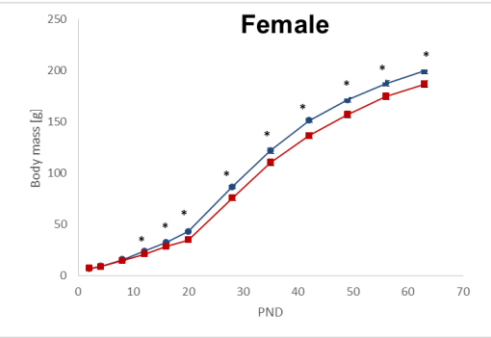

**Fig. S6.**

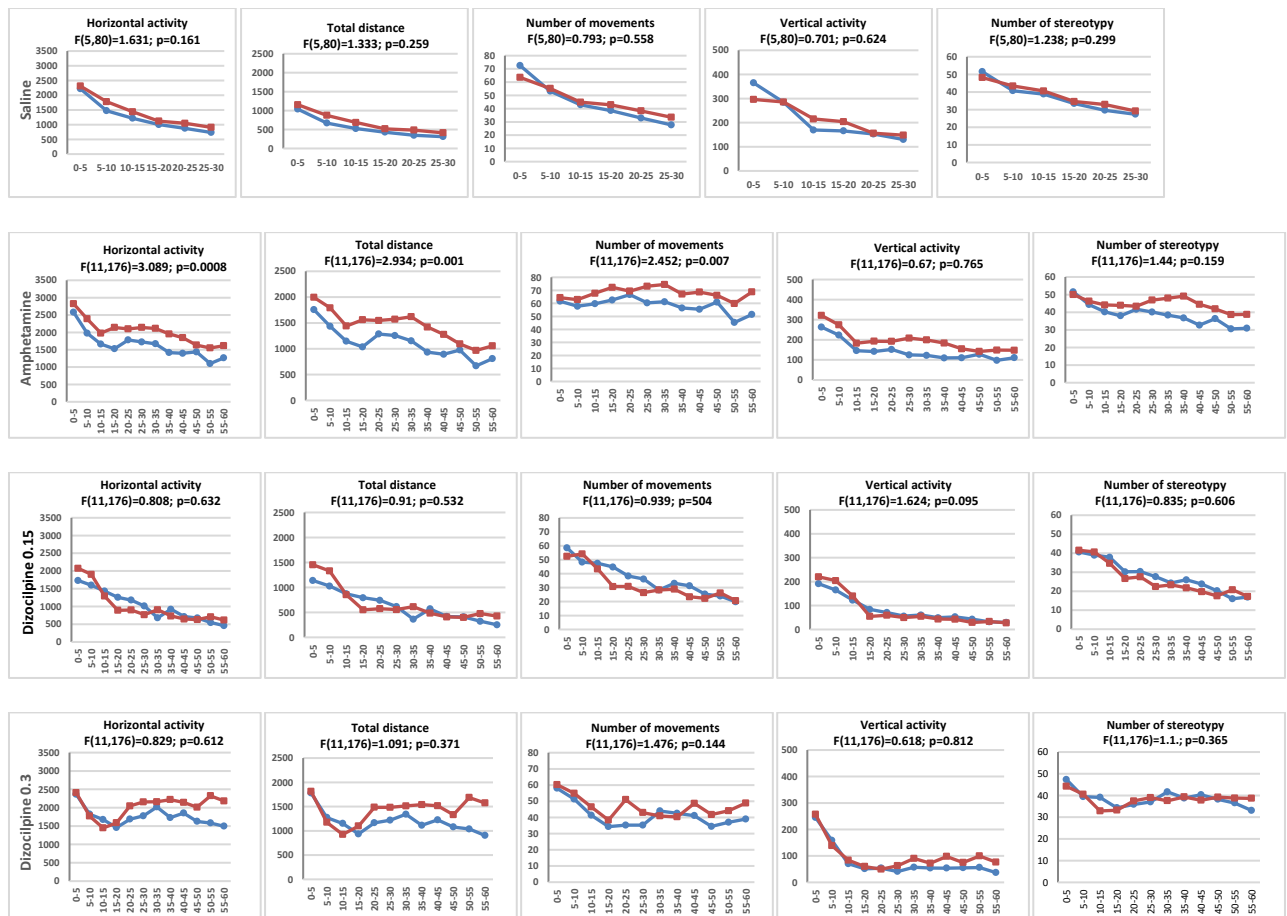



**Fig. S7.**

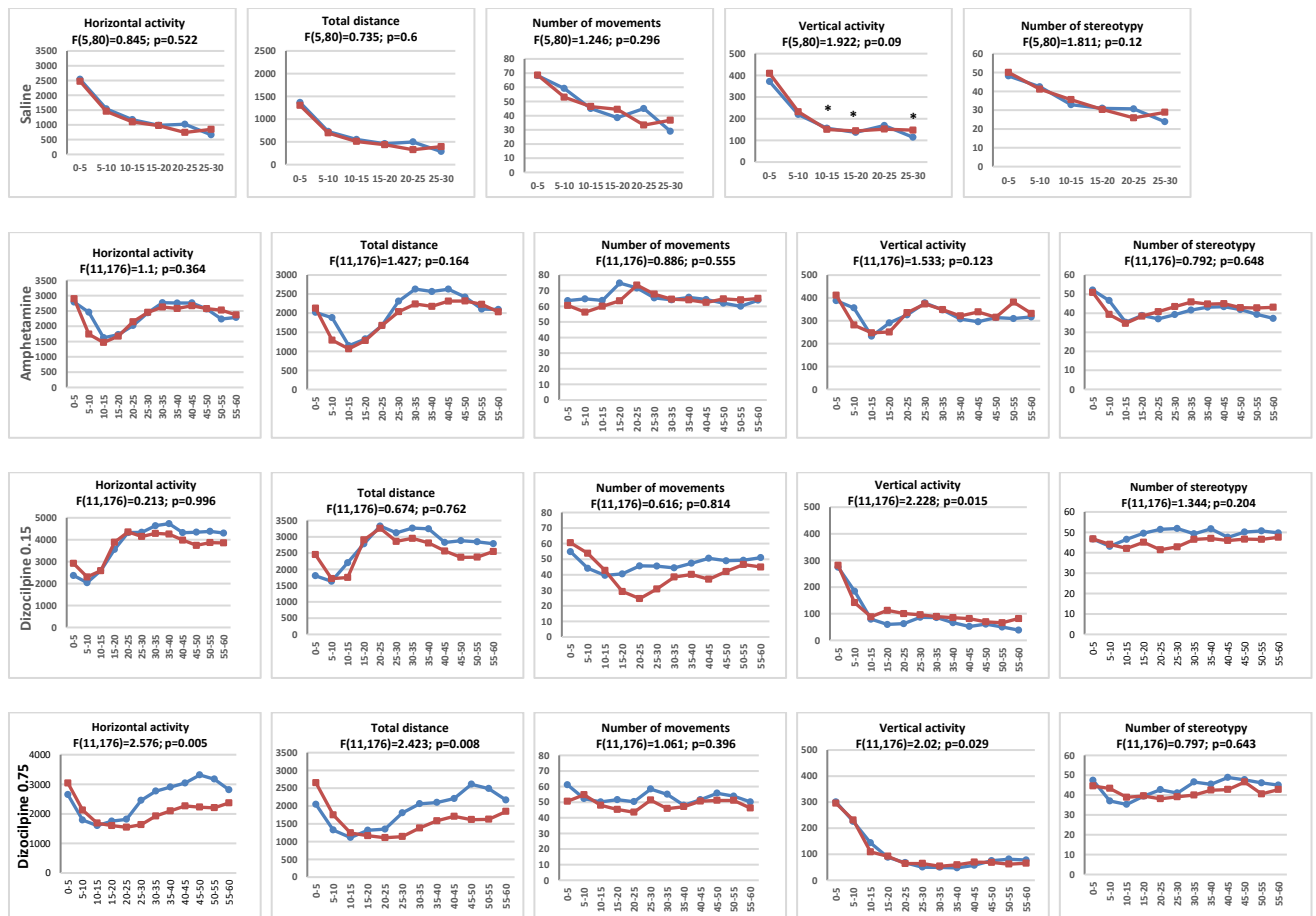

**Fig. S8.**

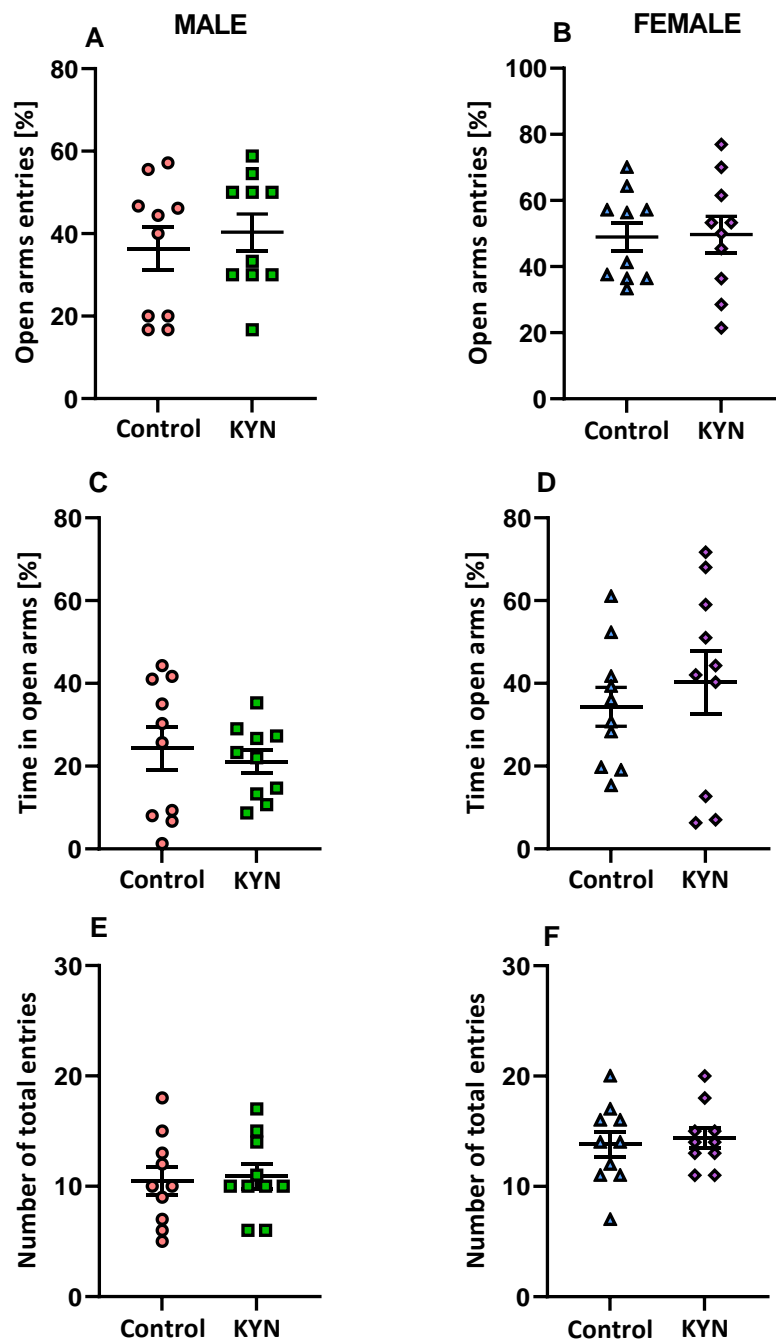

**Fig. S9.**

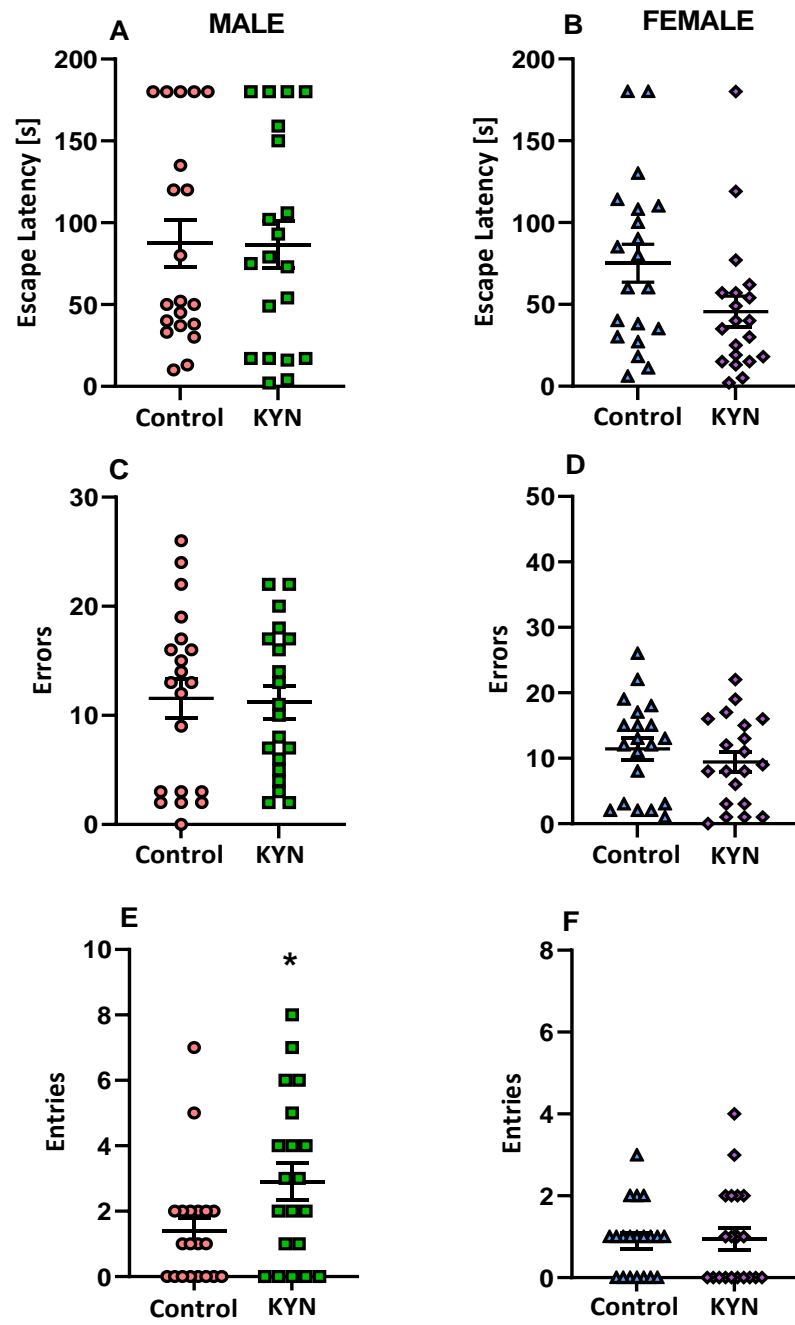

**Fig. S10.**

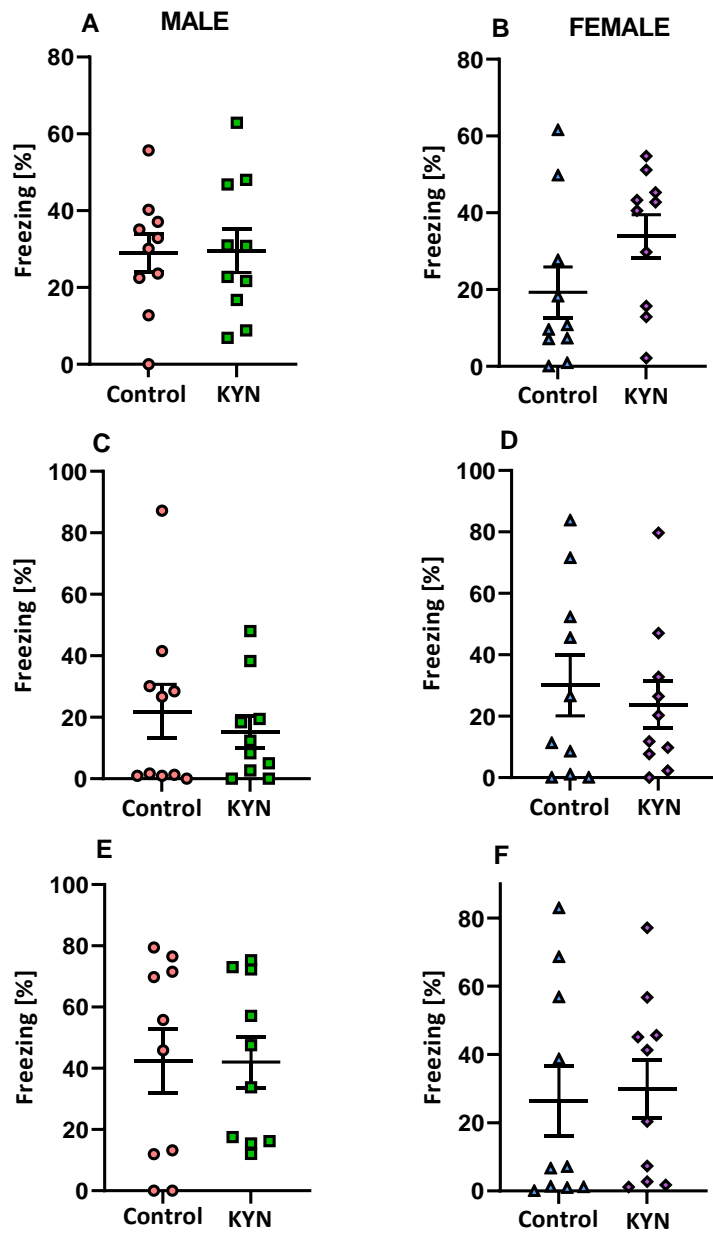

**Table S1.**

| Compound [mM] | Control     | KYN-treated  | p <0.05 vs control |
|---------------|-------------|--------------|--------------------|
| Tryptophan    | 56.44±10.52 | 125.35±12.07 | YES                |
| KYN           | 1.08±0.19   | 2.11±0.57    | YES                |
| KYNA          | 0.11±0.02   | 0.27±0.03    | YES                |

Blood was collected on day 21 postpartum; data are presented as a mean±SEM; N=6 per group

**Table S2.**

| Compound [mM] | Young      |             | p <0.05 vs control | Adult       |             | p <0.05 vs control |
|---------------|------------|-------------|--------------------|-------------|-------------|--------------------|
|               | Control    | KYN-treated |                    | Control     | KYN-treated |                    |
| Tryptophan    | 98.40±4.36 | 85.97±2.28  | YES                | 122.96±4.45 | 99.44±3.26  | YES                |
| KYN           | 1.19±0.13  | 2.30±0.40   | YES                | 2.40±0.09   | 2.27±0.10   | NO                 |
| KYNA          | 0.16±0.001 | 0.13±0.004  | YES                | 0.05±0.003  | 0.05±0.005  | NO                 |

Data are presented as a mean±SEM; N=9-10 per group

**Table S3.**

| Compound [mM] | Young      |             | p <0.05 vs control | Adult       |             | p <0.05 vs control |
|---------------|------------|-------------|--------------------|-------------|-------------|--------------------|
|               | Control    | KYN-treated |                    | Control     | KYN-treated |                    |
| Tryptophan    | 85.63±6.96 | 90.41±2.69  | NO                 | 117.37±5.72 | 84.38±6.76  | YES                |
| KYN           | 1.16±0.14  | 1.69±0.13   | YES                | 2.52±0.09   | 2.82±0.24   | NO                 |
| KYNA          | 0.14±0.02  | 0.13±0.004  | NO                 | 0.07±0.005  | 0.09±0.012  | NO                 |

Data are presented as a mean±SEM; N=9-10 per group

**Table S4.**

|                                       |                                   |   |
|---------------------------------------|-----------------------------------|---|
| Elevated plus-maze test               | Open arms entries                 | = |
|                                       | Time in open arms                 | = |
|                                       | Number of total entries           | = |
| Barnes maze test                      | Escape latency                    | = |
|                                       | Errors                            | = |
|                                       | Entries                           | ↑ |
| Contextual and cued fear conditioning | Training                          | = |
|                                       | Contextual fear conditioning test | = |
|                                       | Cue fear conditioning test        | = |

= no effect, ↑ increase

**Table S5.**

|                                       |                                   |   |
|---------------------------------------|-----------------------------------|---|
| Elevated plus-maze test               | Open arms entries                 | = |
|                                       | Time in open arms                 | = |
|                                       | Number of total entries           | = |
| Barnes maze test                      | Escape latency                    | = |
|                                       | Errors                            | = |
|                                       | Entries                           | = |
| Contextual and cued fear conditioning | Training                          | = |
|                                       | Contextual fear conditioning test | = |
|                                       | Cue fear conditioning test        | = |

= no effect
